# Supplementary material for: A naphthalene-based Al3+ selective fluorescent sensor for living cell imaging
Source: Royal Society of Chemistry journal article supplement (doi:10.1039/c1ob05479a), 2011-01-01

†Electronic Supplementary Information (ESI)

**A naphthalene based Al<sup>3+</sup> selective fluorescent sensor for living cell imaging**

Animesh Sahana<sup>a</sup>, Arnab Banerjee<sup>a</sup>, Sudipta Das<sup>a</sup>, Sisir Lohar, Debasis Karak, Bidisha Sarkar<sup>b</sup>,  
Subhra Kanti Mukhopadhyay<sup>b</sup>, Asok K. Mukherjee<sup>\*a</sup> and Debasis Das<sup>\*a</sup>

---

<sup>a</sup>Department of Chemistry, The University of Burdwan, Burdwan – 713104, West Bengal, India, Debasis Das < e-mail: [ddas100in@yahoo.com](mailto:ddas100in@yahoo.com) >; Tel: +91-342-2533913; Fax: +91-342-2530452

<sup>b</sup>Department of Microbiology, The University of Burdwan, Burdwan – 713104, West Bengal, India.

---

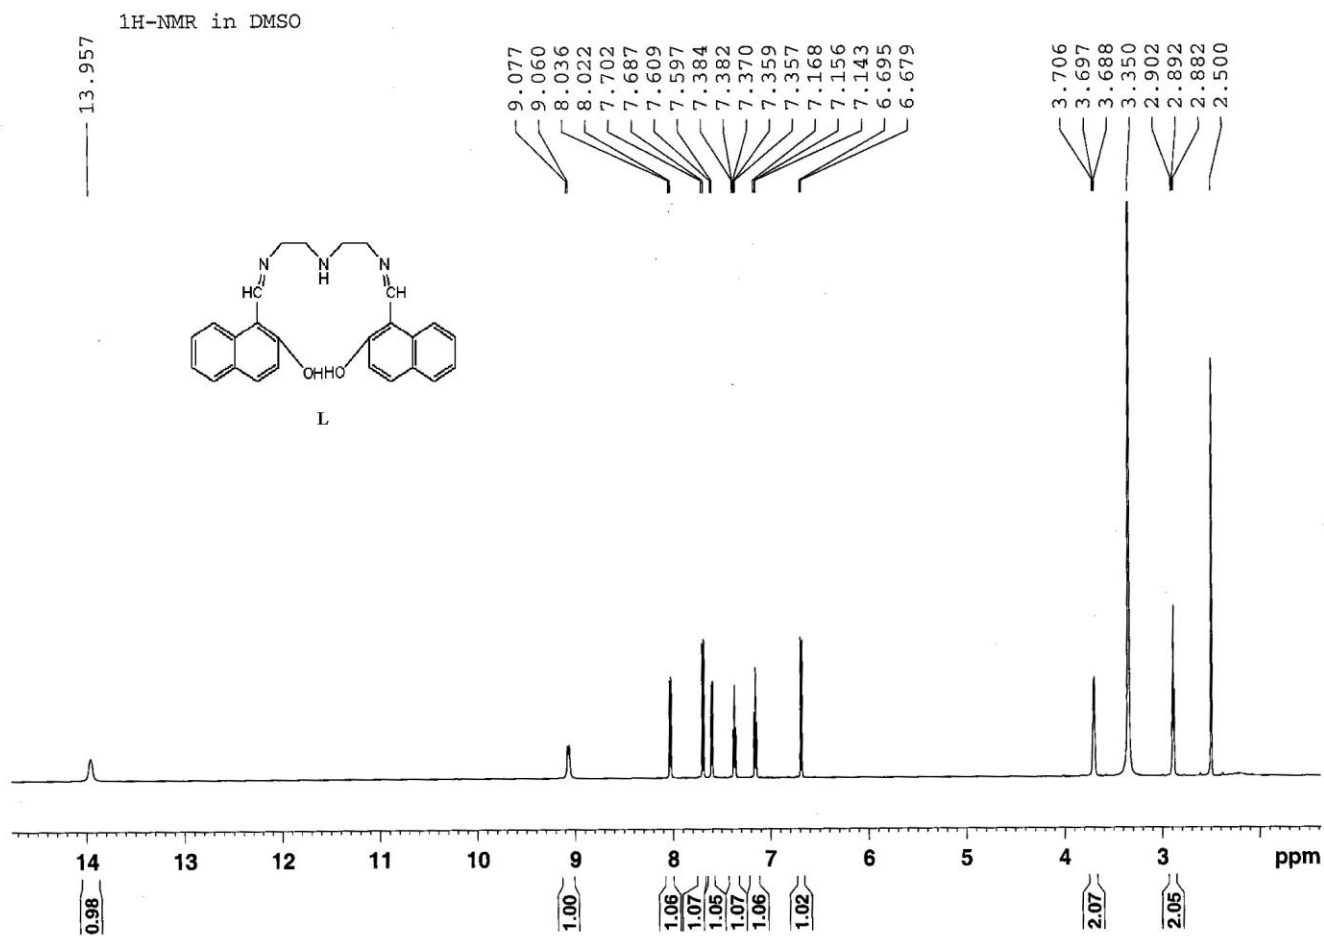

**Fig. S1.** <sup>1</sup>HNMR of **L** in DMSO-d<sub>6</sub>.

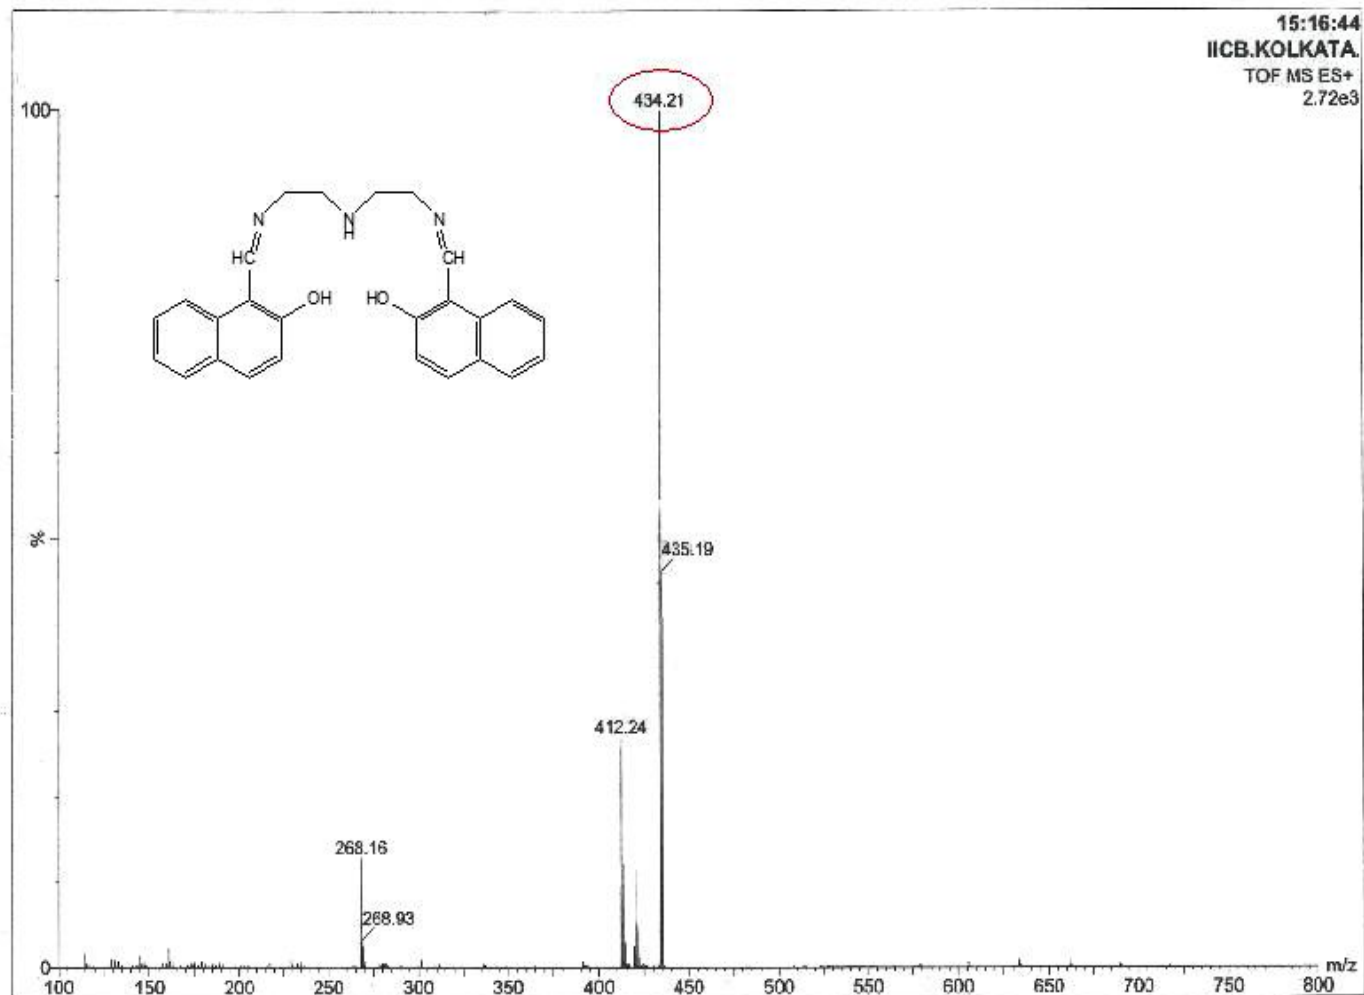

**Fig.S2.** QTOF-MS spectrum of **L**

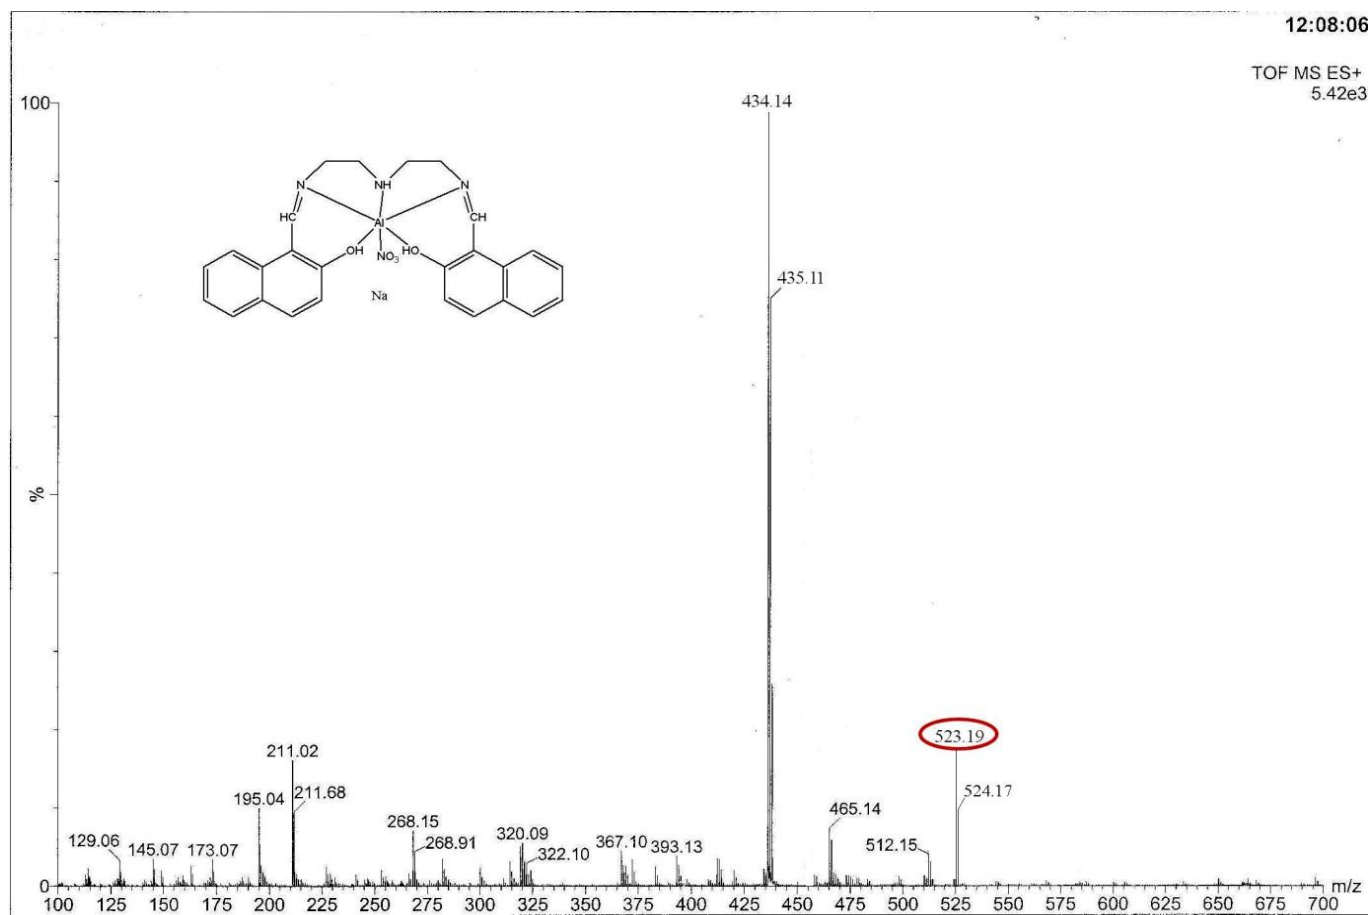

**Fig. S3.** QTOF-MS spectrum of complex  $[L + Al^{3+} + NO_3]Na^+$ .

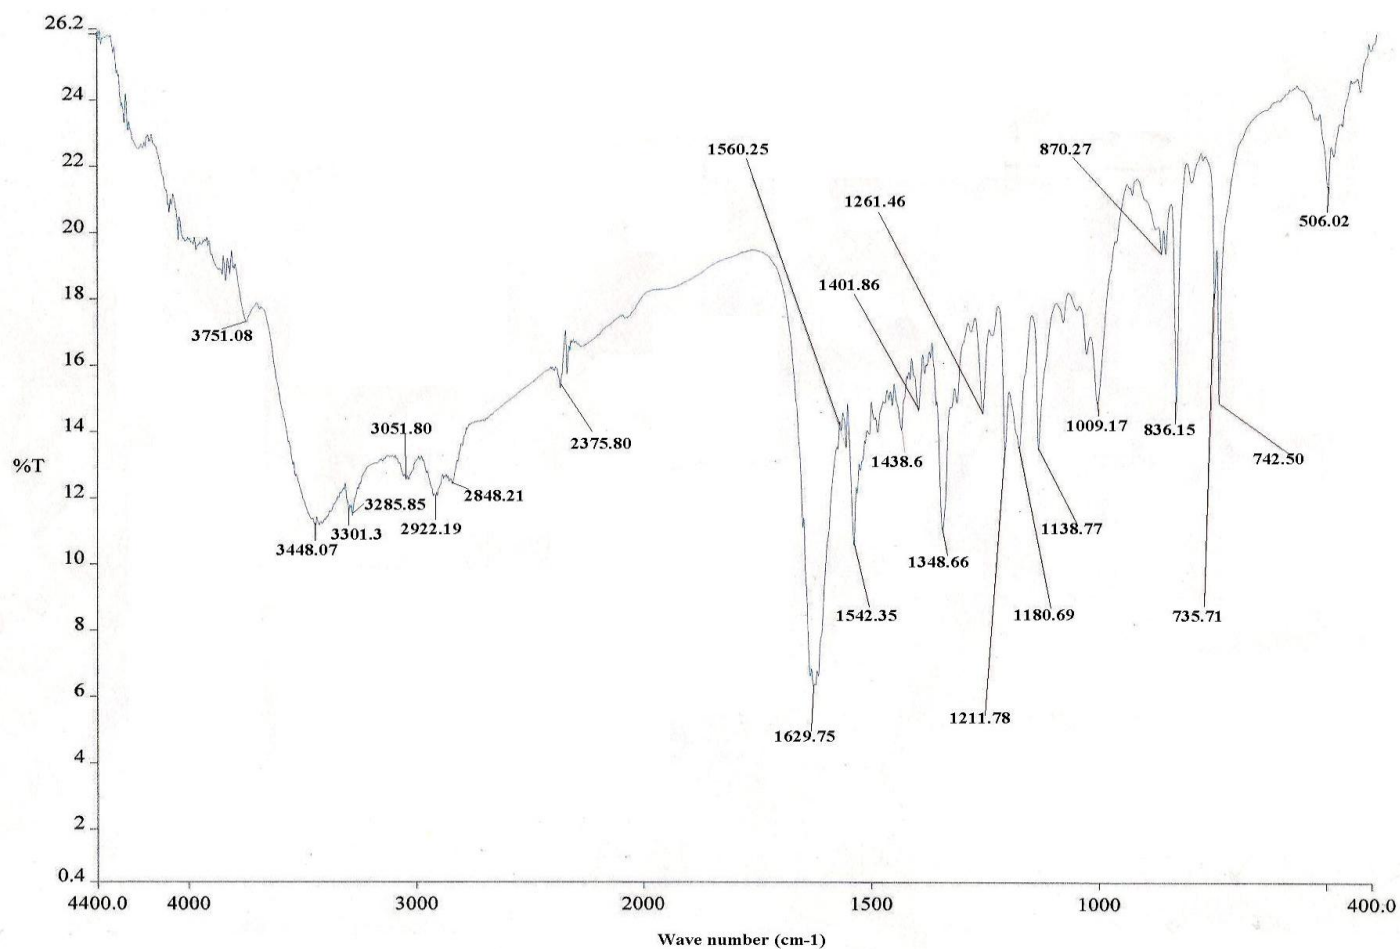

**Fig.S4.** FTIR spectra of **L**

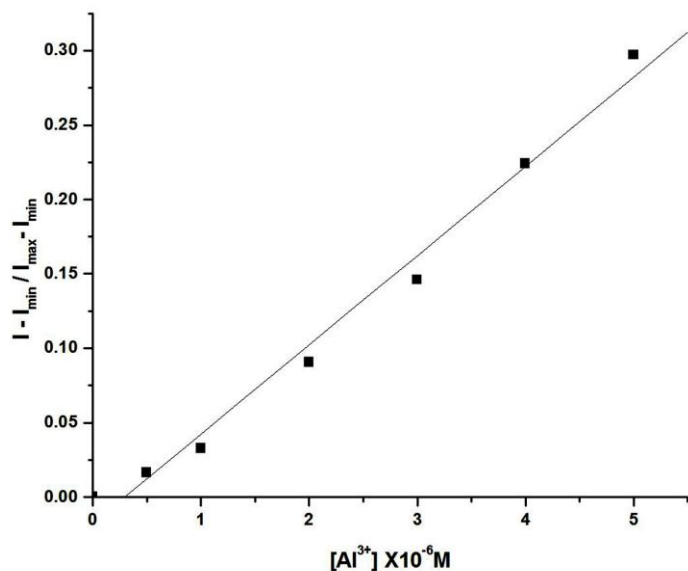

**Fig.S5.** Emission intensities of **L** (10  $\mu$ M) as a function of externally added [Al<sup>3+</sup>] in ethanol,  $\lambda_{em}$ : 445 nm,  $\lambda_{ex}$  : 355 nm. The detection limit is  $3.0 \times 10^{-7}$ .

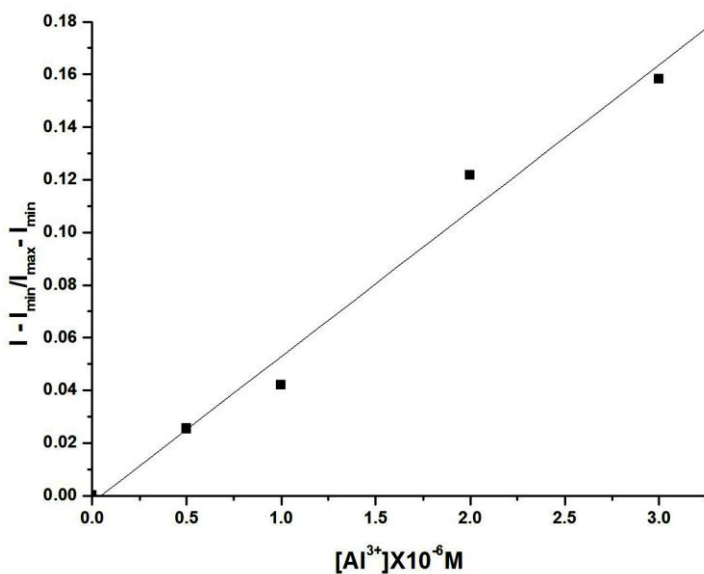

**Fig.S6.** Emission intensities of **L** (10  $\mu$ M) as a function of externally added [Al<sup>3+</sup>] in HEPES buffer (0.1 M in ethanol/water = 3/7, v/v, pH 7.4,  $\lambda_{em}$ : 445 nm,  $\lambda_{ex}$  : 355 nm). The detection limit is  $1.0 \times 10^{-7}$ .

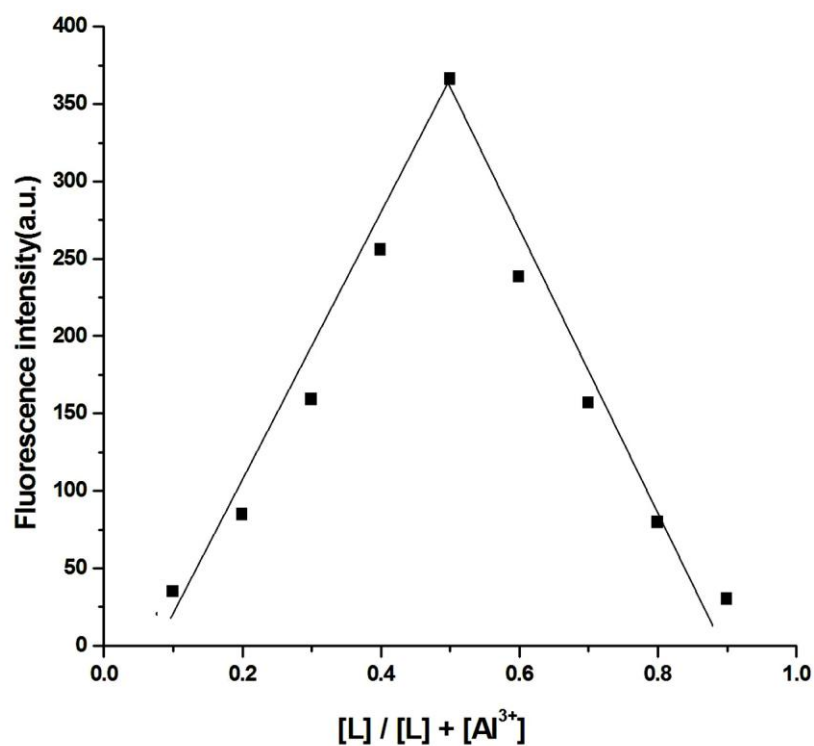

**Fig. S7.** Job's plot of the complexation reaction between **L** and  $Al^{3+}$  in HEPES buffer (0.1 M) solution (ethanol/water = 3/7, v/v, pH 7.4).

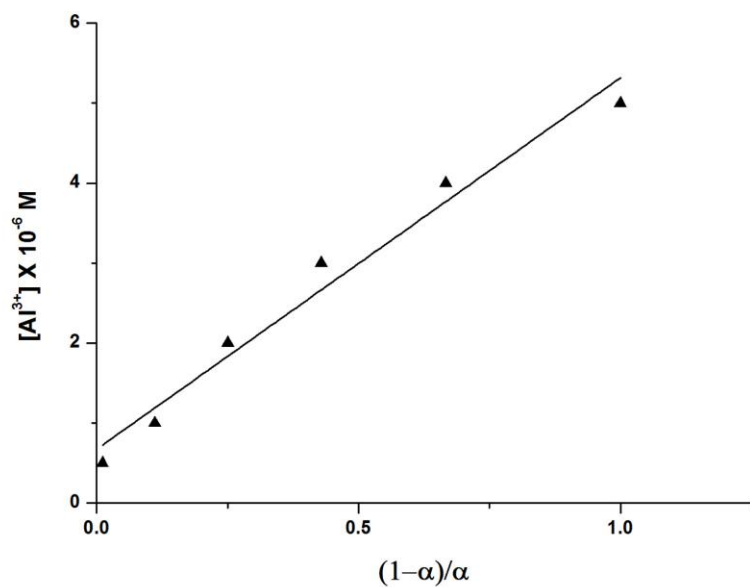

**Fig. S8.** The binding constant ( $K_a$ ) of **L** for  $Al^{3+}$

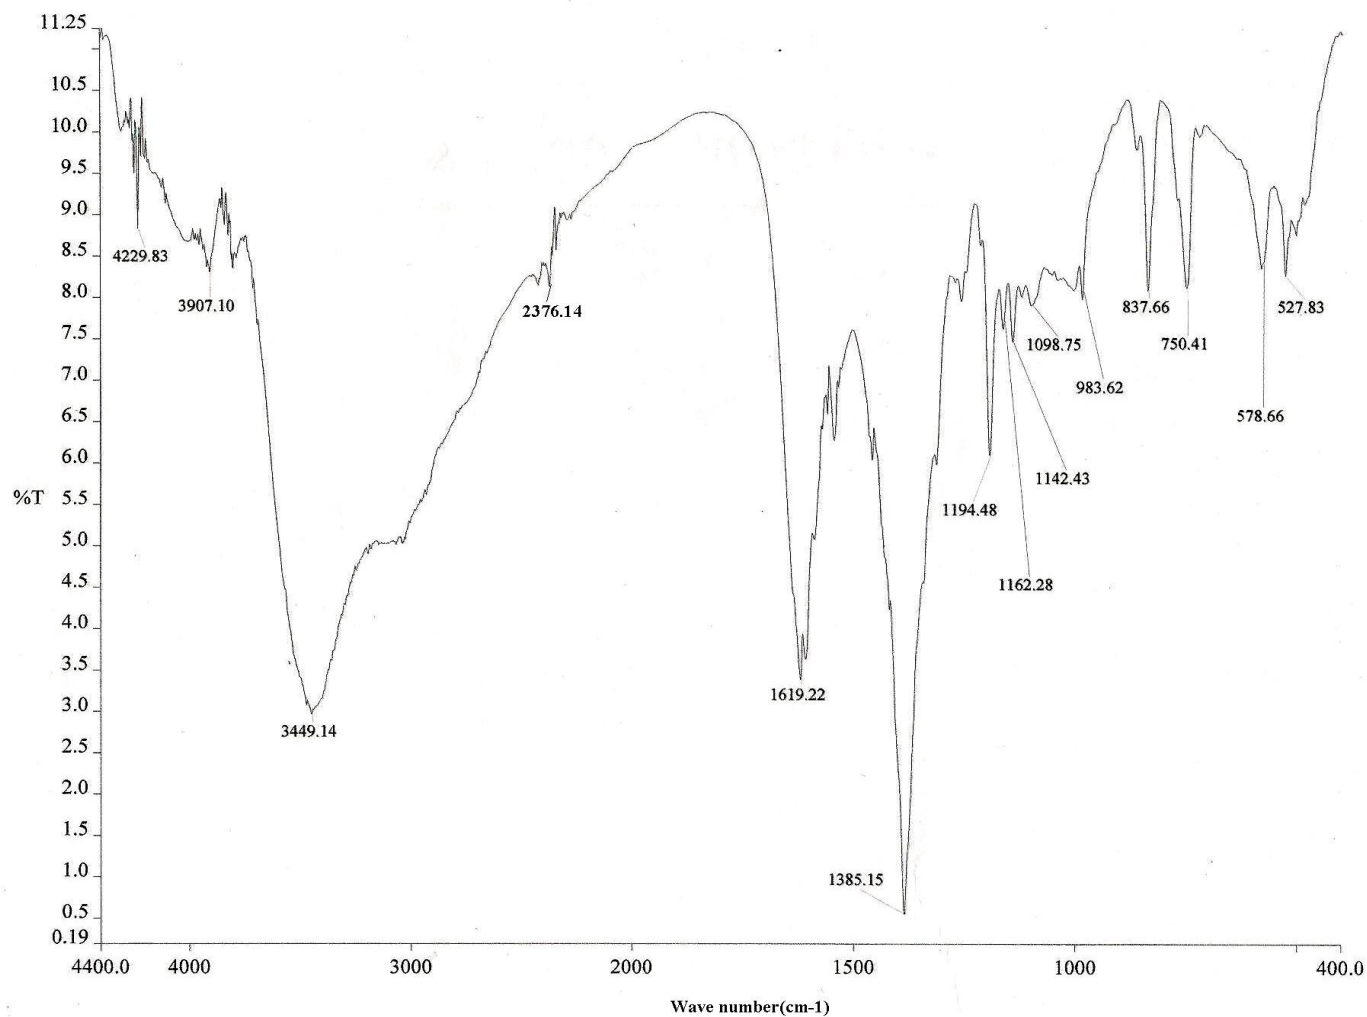

**Fig. S9.** FTIR spectra of [L-Al]<sup>3+</sup> NO<sub>3</sub> complex.



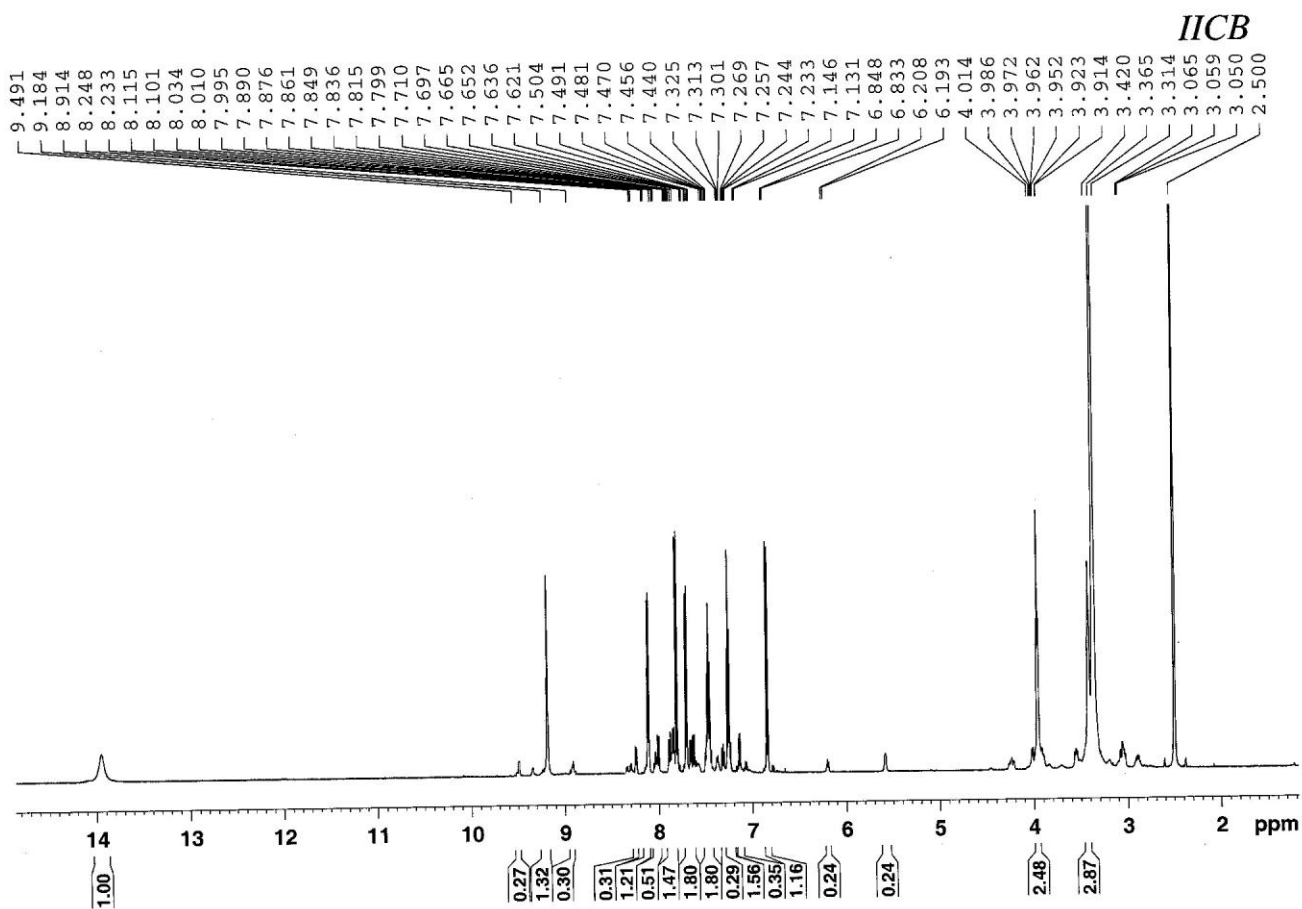

**Fig. S10.**  $^1\text{H}$ NMR spectra of  $[\text{L-Al}]^{3+} \text{NO}_3$  complex. in  $\text{DMSO-d}_6$ .

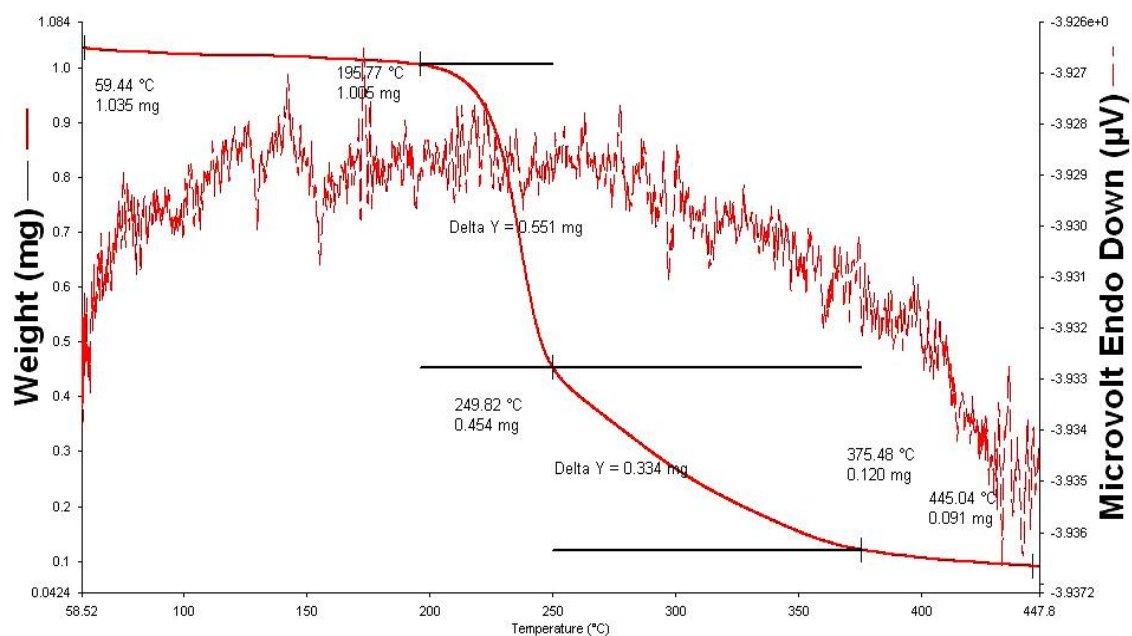

**Fig. S11.** Thermogravimetric analysis of **L**.

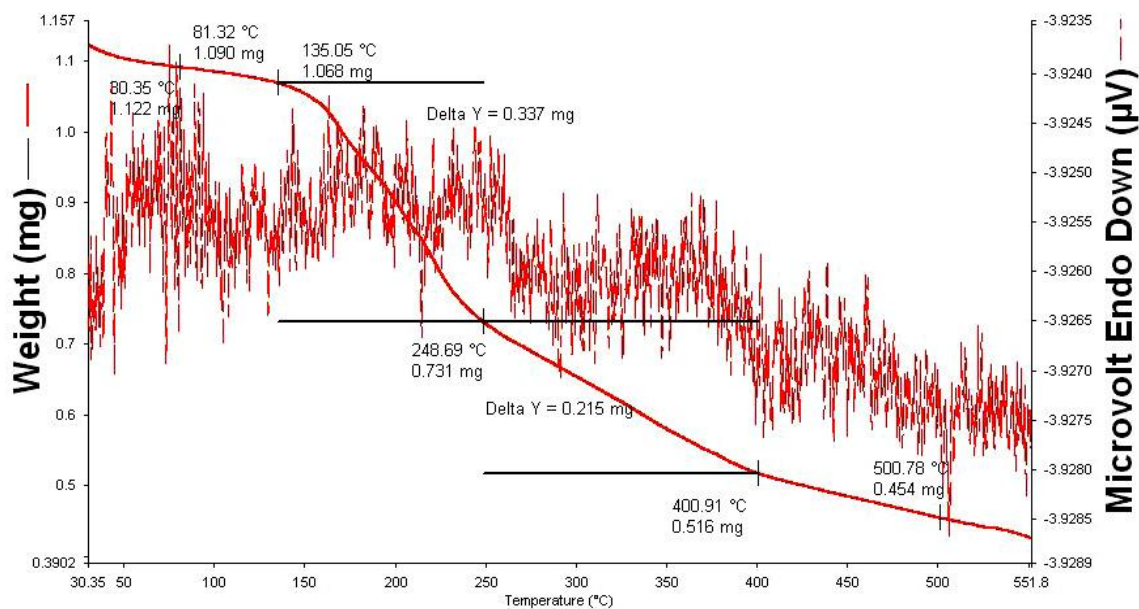

**Fig. S 12.** Thermogravimetric analysis of **[L-Al<sup>3+</sup>]<sup>+</sup>NO<sub>3</sub>** complex.

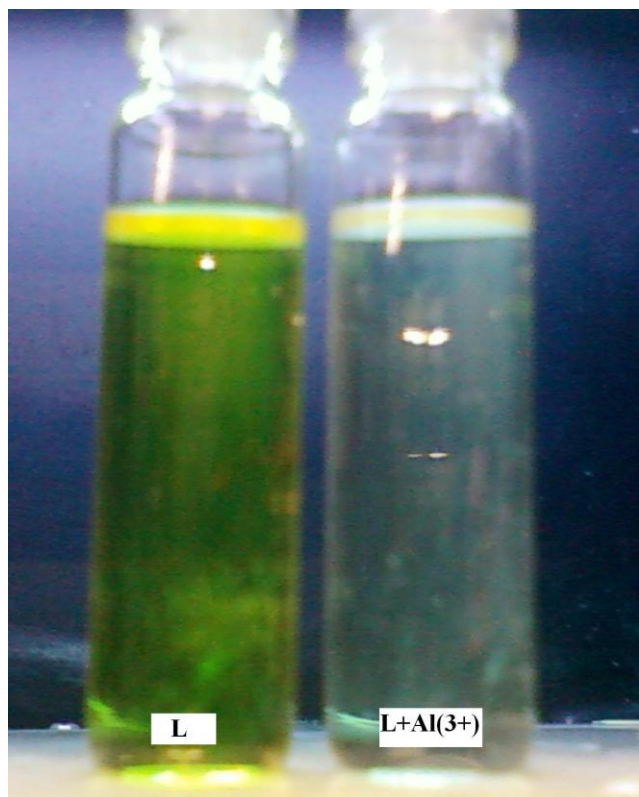

**Fig. S 13.** Colour change of the Ligand solution after adding equivalent quantity of  $\text{Al}^{3+}$  (under UV light).

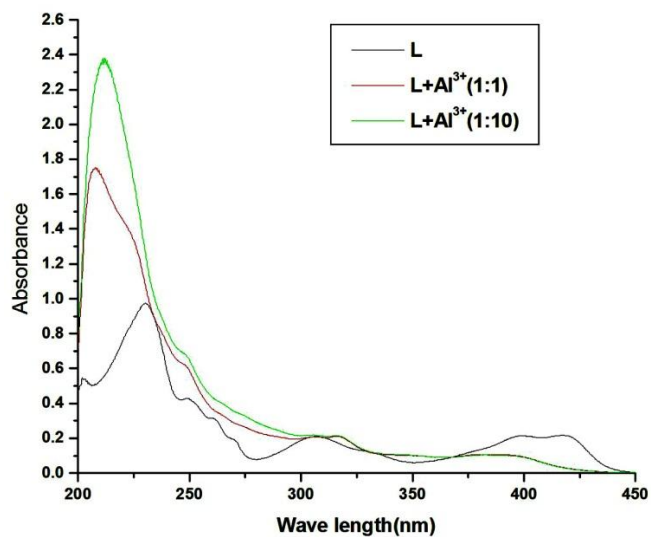

**Fig. S 14.** Absorbance spectra of **L** (10  $\mu\text{M}$ ), **L** +  $\text{Al}^{3+}$  (1:1, mole ratio) and **L** +  $\text{Al}^{3+}$  (1:10, mole ratio) in HEPES buffer (0.1 M) solution (ethanol/water = 3/7, v/v, pH 7.4).

### 1. General method of UV-vis. and fluorescence titration

Path length of the cells used for absorption and emission studies was 1 cm. For UV-vis and fluorescence titrations, stock solution of **L** was prepared ( $C = 10 \mu\text{M}$ ) in ethanol and ethanol/water (3/7, v/v) HEPES (0.1M) buffer. Working solutions of **L** and  $\text{Al}^{3+}$  were prepared from their respective stock solutions. Fluorescence measurements were performed using 5 nm x 5 nm slit width.

### 2. Calculation of Quantum Yield

Fluorescence quantum yields ( $\Phi$ ) were estimated by integrating the area under the fluorescence curves using the equation,

$$\phi_{\text{sample}} = \frac{\text{OD}_{\text{standard}} \times A_{\text{sample}}}{\text{OD}_{\text{sample}} \times A_{\text{standard}}} \times \phi_{\text{standard}}$$

where A was the area under the fluorescence spectral curve and OD was optical density of the compound at the excitation wavelength<sup>1</sup>. Anthracene was used as quantum yield standard (quantum yield is 0.27 in ethanol)<sup>2</sup> for measuring the quantum yields of ligand and its  $\text{Al}^{3+}$  complex.

### 3. Job's plot from fluorescence experiments

A series of solutions containing **L** and  $\text{Al}(\text{NO}_3)_3$  were prepared such that the total concentration of  $\text{Al}^{3+}$  and **L** remained constant ( $10 \mu\text{M}$ ) in all the sets. The mole fraction (X) of **L** was varied from 0.1 to 0.9. The fluorescence intensity at 445 nm was plotted against the mole fraction of the ligand (**L**) in solution.

### 4. Determination of Binding Constant

Li *et al.* derived the following Tsein equation<sup>3</sup> that can be used to find out the stoichiometric ratio between the ligand and metal ion.

$$[M^{n+}]^m = \frac{1}{n \cdot K} \cdot \frac{1}{[L]_T^{n-1}} \cdot \frac{1-\alpha}{\alpha^n}$$

Where K is complex equilibrium constant,  $M_mL_n$  is the complex species, L is ligand and M is the metal ion. Third bracket is used to denote their concentration.  $\alpha$  is the ratio between free ligand concentration [L], and its initial concentration  $[L]_T$ . In our case, the stoichiometric ratio of the  $Al^{3+}$ : L was 1:1. So, this equation can be written as  $[Al^{3+}] = 1/K \cdot (1-\alpha)/\alpha$ . The curve fitting of the experimental data points using this equation yielded,  $K_a = (2.12 \pm 0.05) \times 10^5 M^{-1}$ .

**Table 1:** Changes in Chemical shifts ( $\delta$  ppm) of L during  $^1H$ NMR titration experiment upon concomitant additions of  $Al^{3+}$ .

| $[Al^{3+}]$<br>Equiv. | -OH  | -CH=N- | -N-H  | -CH <sub>2</sub><br>(a) | -CH <sub>2</sub><br>(b) | Ar-H<br>(e) | Ar-H<br>(f) | Ar-H<br>(g) | Ar-H<br>(h) | Ar-H<br>(i) | Ar-H<br>(j) |
|-----------------------|------|--------|-------|-------------------------|-------------------------|-------------|-------------|-------------|-------------|-------------|-------------|
| 0.00                  | 13.9 | 9.1    | ----- | 2.9                     | 3.7                     | 6.7         | 8.0         | 7.6         | 7.15        | 7.4         | 7.7         |
| 1.00                  | 13.9 | 9.2    | 5.6   | 3.4                     | 4.0                     | 6.85        | 8.1         | 7.7         | 7.3         | 7.5         | 7.8         |
| 2.00                  | 13.9 | 9.2    | 5.6   | 3.4                     | 4.0                     | 6.85        | 8.1         | 7.7         | 7.3         | 7.5         | 7.8         |

## References

- 1 E. Austin, M. Gouterman, *Bioinorg. Chem.*, 1978, **9**, 281.
- 2 W. H. Melhuish, *J. Phys. Chem.*, 1961, **65**, 229.
- 3 G. Gryniewicz, M. Poenie and R. Y. Tsein, *J. Biol. Chem.* 1985, **260**, 3440.

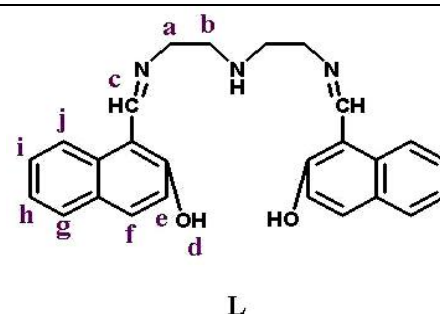

Supplement: c1ob05479a.pdf [file c1ob05479a.pdf]
